# Supplementary material for: A gene expression network model of type 2 diabetes links cell cycle regulation in islets with diabetes susceptibility
Source: HighWire-hosted journal article supplement (doi:10.1101/gr.074914.107), 2008-03-17
Supplement: 074914_keller_suptable1.pdf [file 074914_keller_suptable1.pdf]

| Pattern<br>number | 4 wk |       | 10 wk |       | Interpretation                   |
|-------------------|------|-------|-------|-------|----------------------------------|
|                   | lean | ob/ob | lean  | ob/ob |                                  |
| 1                 | 1    | 1     | 1     | 1     | null hypothesis (none different) |
| 2                 | 2    | 1     | 1     | 1     | 4 wk lean only                   |
| 3                 | 1    | 1     | 2     | 1     | 10 wk lean only                  |
| 4                 | 1    | 2     | 1     | 1     | 4 wk ob/ob only                  |
| 5                 | 1    | 1     | 1     | 2     | 10 wk ob/ob only                 |
| 6                 | 1    | 2     | 1     | 2     | Obesity only                     |
| 7                 | 1    | 1     | 2     | 2     | Age only                         |
| 8                 | 1    | 2     | 2     | 1     | Age and obesity                  |
| 9                 | 1    | 1     | 2     | 3     | Age, and obesity at 10 weeks     |
| 10                | 1    | 3     | 2     | 2     | Age, and obesity at 4 weeks      |
| 11                | 1    | 2     | 1     | 3     | Obesity, and age when obese      |
| 12                | 1    | 3     | 2     | 3     | Obesity, and age when lean       |
| 13                | 1    | 3     | 2     | 1     | Age and obesity                  |
| 14                | 1    | 2     | 2     | 3     | Age and obesity                  |
| 15                | 1    | 3     | 2     | 4     | Age and obesity (all different)  |
